# Supplementary material for: Single-Cell Expression Profiling Reveals a Dynamic State of Cardiac Precursor Cells in the Early Mouse Embryo
Source: PLOS journal article supplement (doi:10.1371/journal.pone.0140831), 2015-10-15
Supplement: S13 (10.1371/journal.pone.0140831.s013) [file journal.pone.0140831.s013]

**Table S3. Number of Reads in deep sequencing**

| Sample ID                 | Total Number of Reads |
|---------------------------|-----------------------|
| EB <i>Tbx5</i> _1         | 36,733,874            |
| EB <i>Tbx5</i> _2         | 36,168,502            |
| EB <i>Tbx5</i> _3         | 32,844,430            |
| EB <i>Nkx2-5</i> _1       | 27,764,442            |
| EB <i>Nkx2-5</i> _2       | 22,681,504            |
| EB <i>Nkx2-5</i> _3       | 35,891,446            |
| EHF <i>Nkx2-5/Tbx5</i> _1 | 37,905,007            |
| EHF <i>Nkx2-5/Tbx5</i> _2 | 36,588,366            |
| EHF <i>Nkx2-5/Tbx5</i> _3 | 34,866,324            |
| EHF <i>Nkx2-5</i> _1      | 33,505,486            |
| EHF <i>Nkx2-5</i> _2      | 35,445,587            |
| EHF <i>Nkx2-5</i> _3      | 12,475,588            |
